# Supplementary material for: Ancestral protein reconstruction reveals evolutionary events governing variation in Dicer helicase function
Source: eLife journal article supplement (doi:10.7554/elife.85120), 2023-04-17
Supplement: fig1-figsupp4-data1 [file elife-85120-fig1-figsupp4-data1-v2.zip]

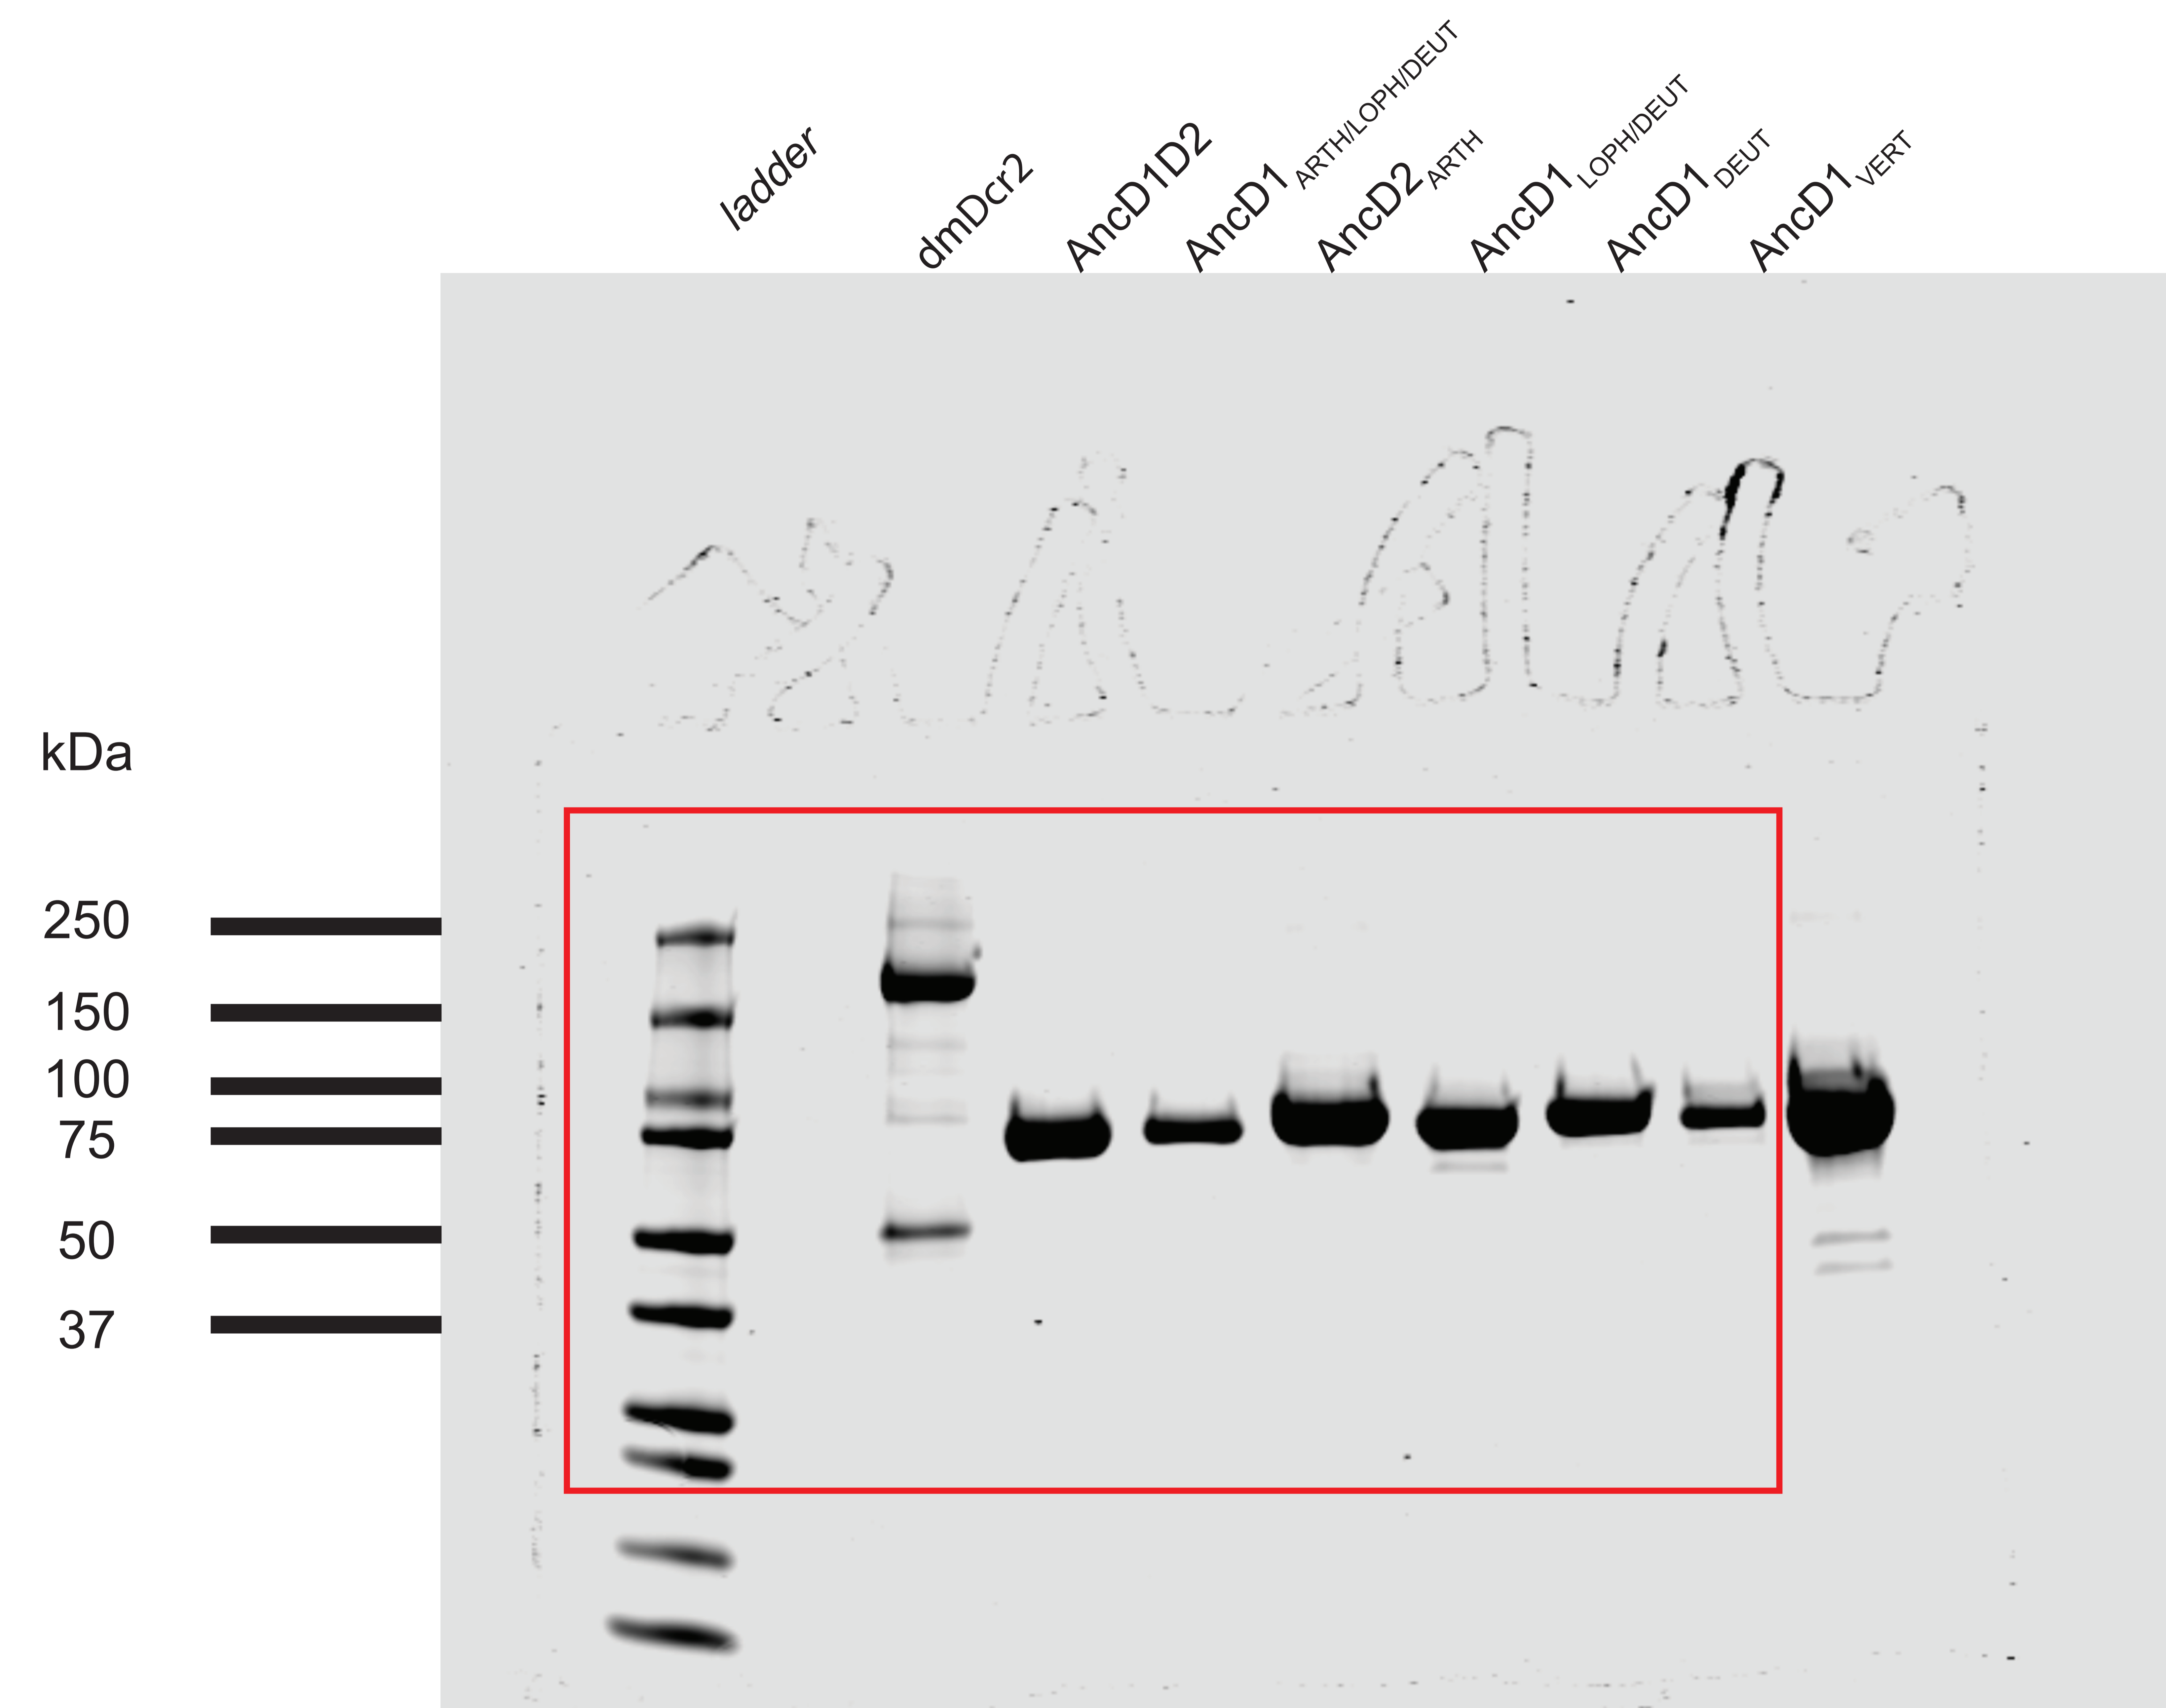

Figure 1-figure supplement 4 - source data 1: Original digital image of SDS-PAGE scanned gel used in B. Region used indicated in red rectangle.
