# Supplementary material for: Ancestral protein reconstruction reveals evolutionary events governing variation in Dicer helicase function
Source: eLife journal article supplement (doi:10.7554/elife.85120), 2023-04-17
Supplement: fig3-data2 [file FIGURE 3 - SOURCE DATA 2 ANCD1D2 3'OVR NO ATP.pdf › FIGURE 3 - SOURCE DATA 2 ANCD1D2 3'OVR NO ATP.pdf]

AncD1D2

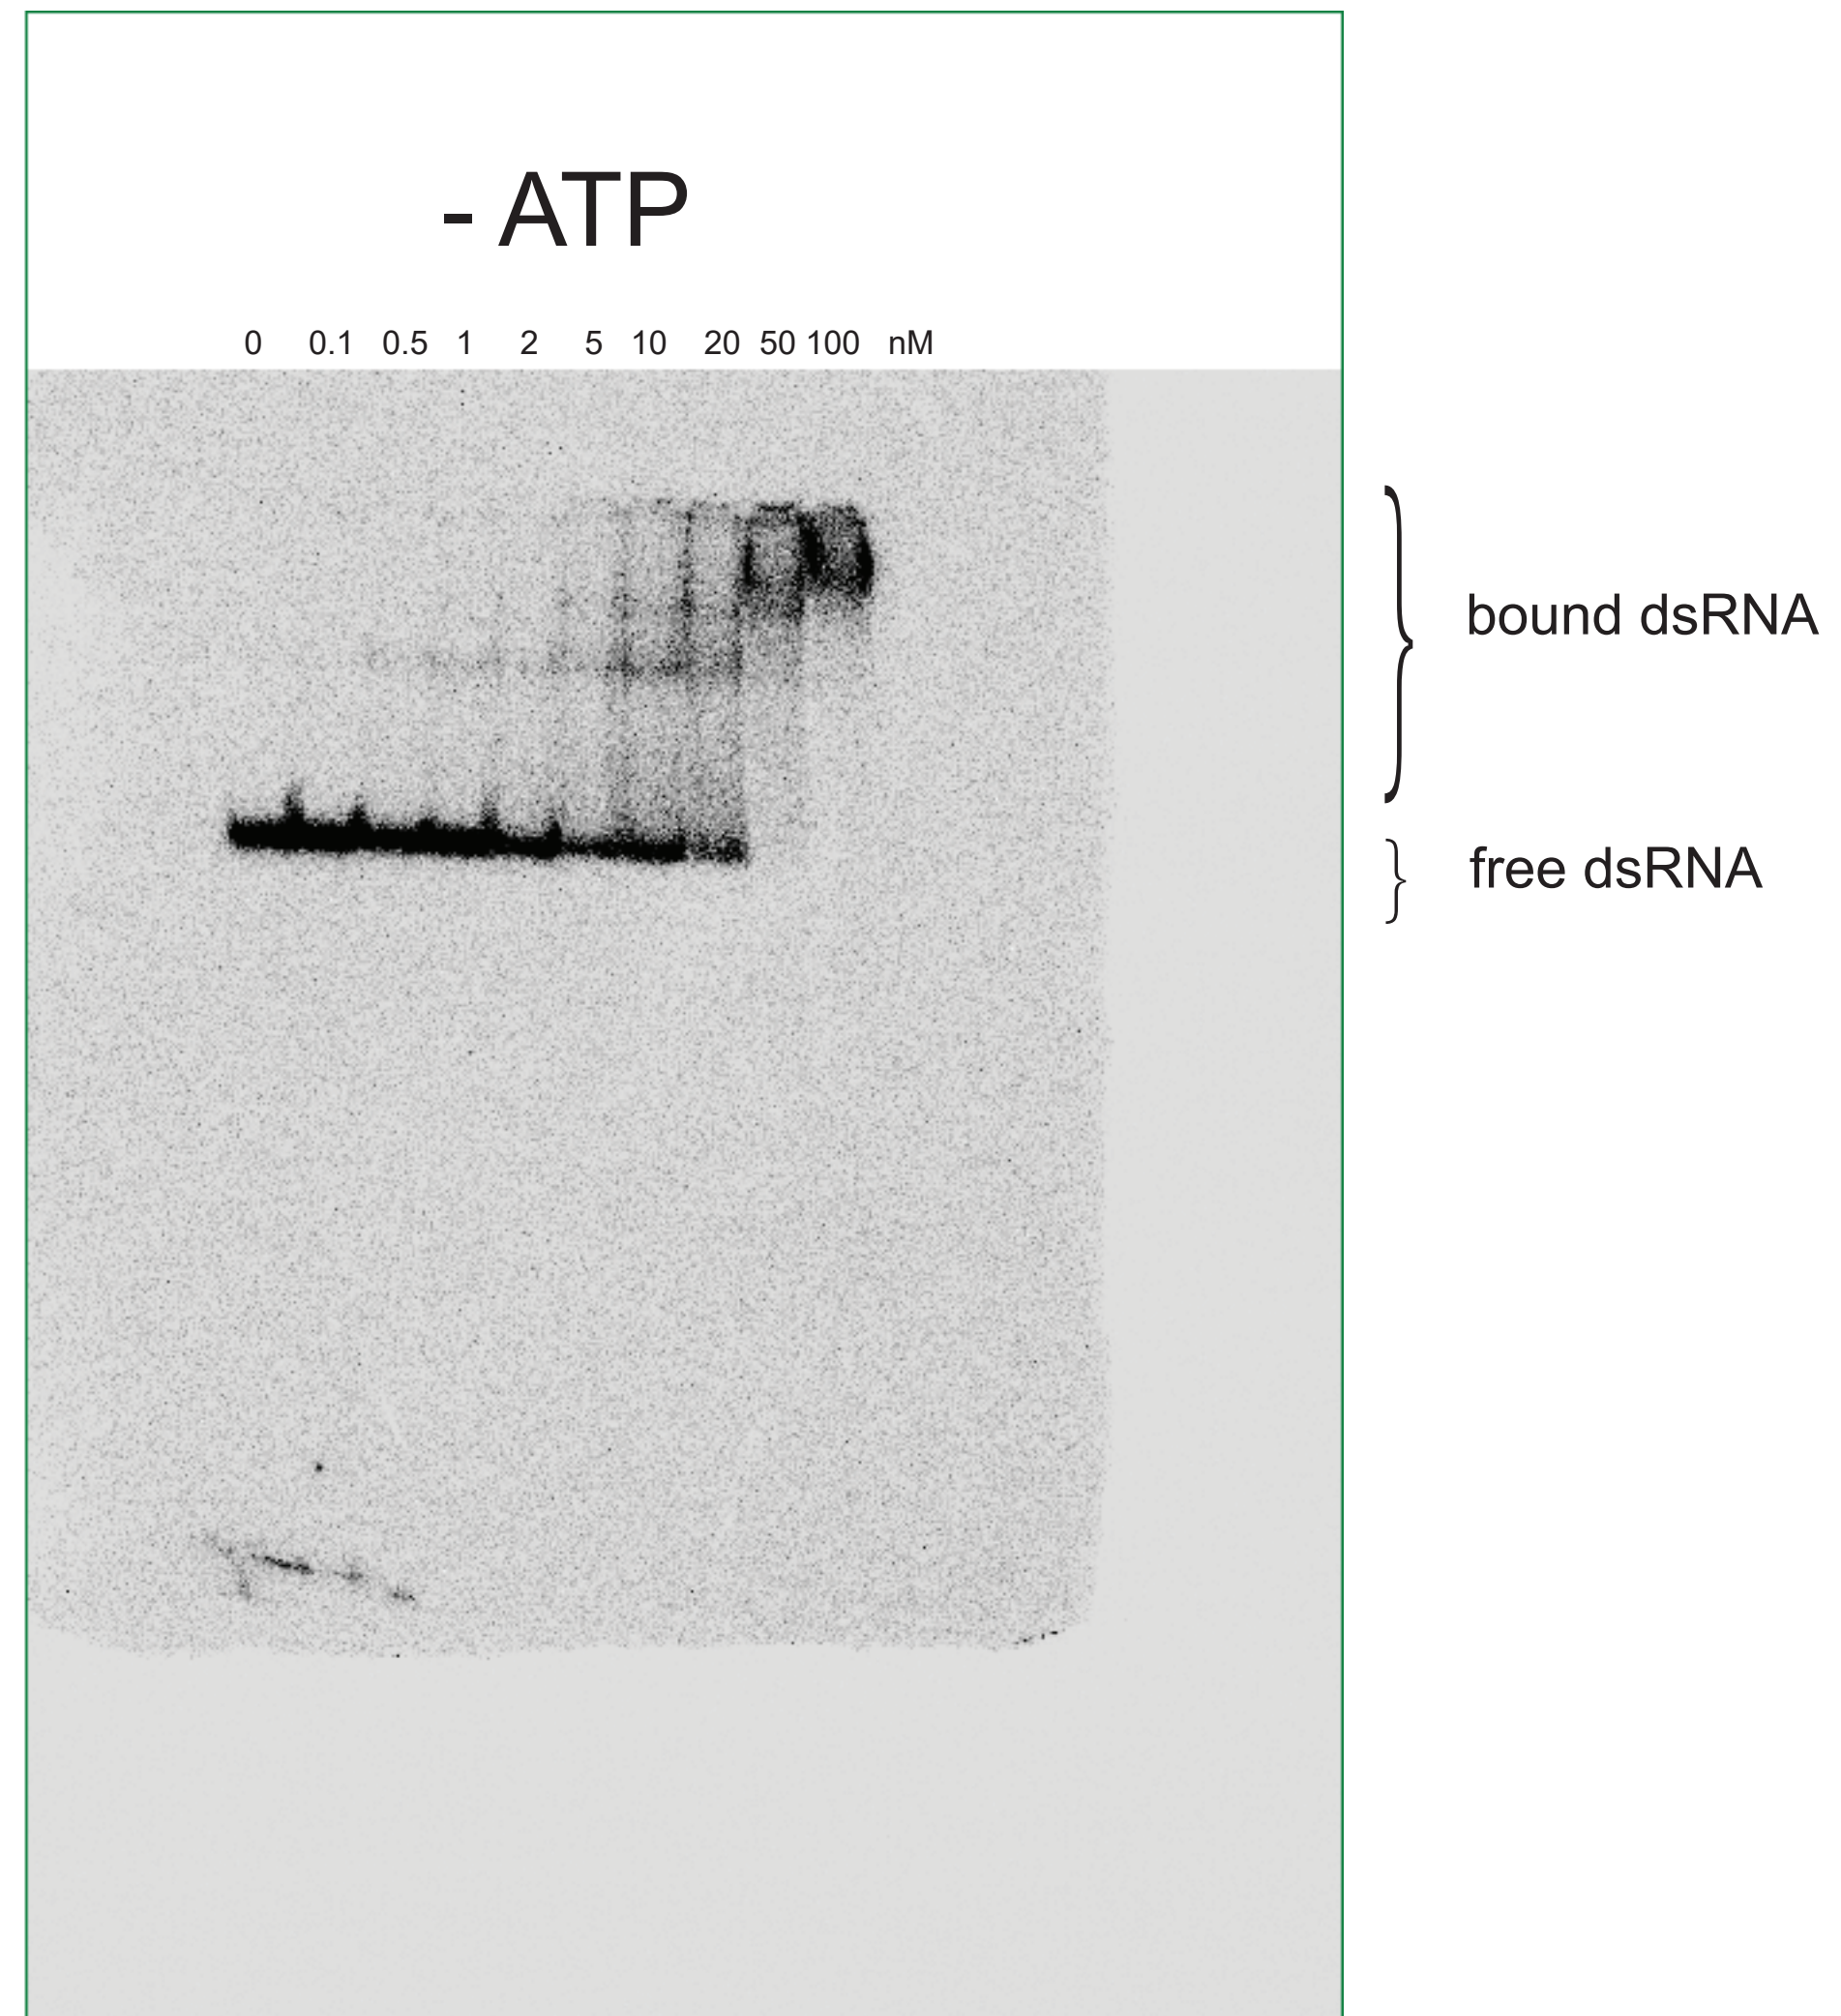

42 3'ovr dsRNA

Figure 3 - source data 2: Original digital image of phosphorimager scan used in Figure 3C, left panel.
