# Supplementary material for: Ancestral protein reconstruction reveals evolutionary events governing variation in Dicer helicase function
Source: eLife journal article supplement (doi:10.7554/elife.85120), 2023-04-17
Supplement: fig3-data5 [file FIGURE 3 - SOURCE DATA 5 ANCD1DEUT 3'OVR.pdf › FIGURE 3 - SOURCE DATA 5 ANCD1DEUT 3'OVR.pdf]

AncD1<sub>DEUT</sub>

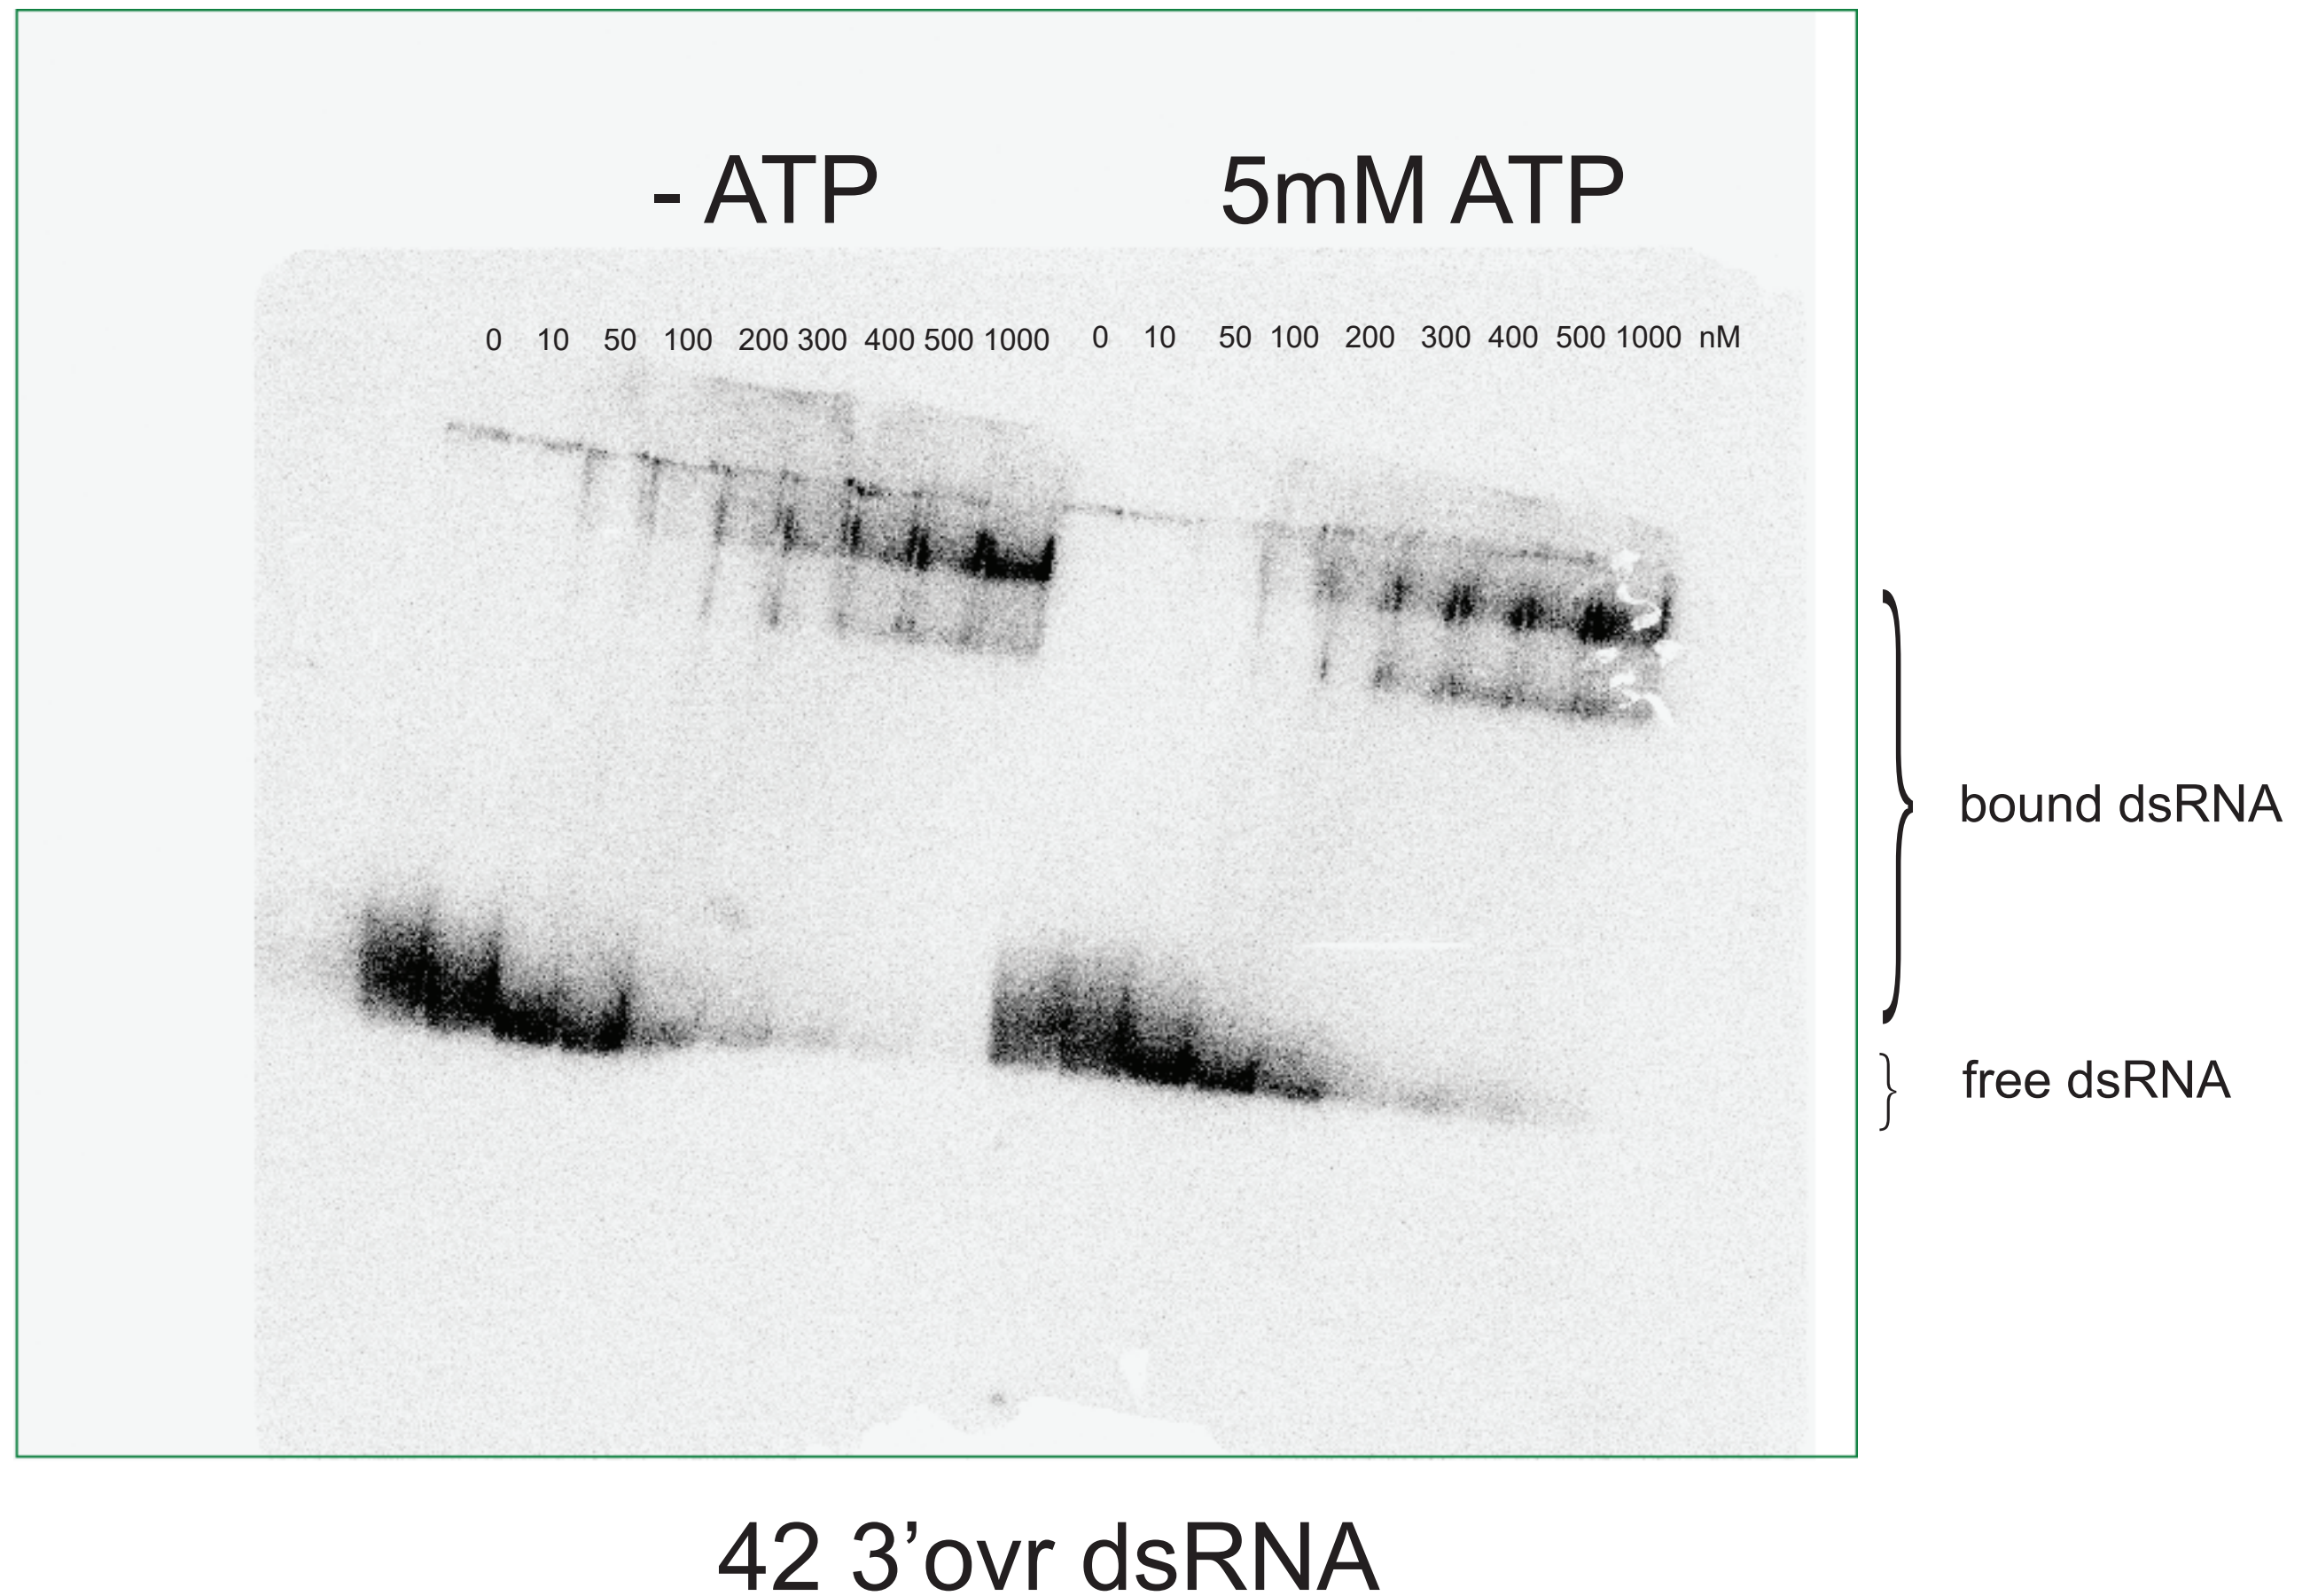

Figure 3 - source data 5: Original digital image of phosphorimager scan used in Figure 3E.
