# Supplementary material for: Ancestral protein reconstruction reveals evolutionary events governing variation in Dicer helicase function
Source: eLife journal article supplement (doi:10.7554/elife.85120), 2023-04-17
Supplement: fig3-data6 [file elife-85120-fig3-data6-v2.zip]

AncD1<sub>VERT</sub>

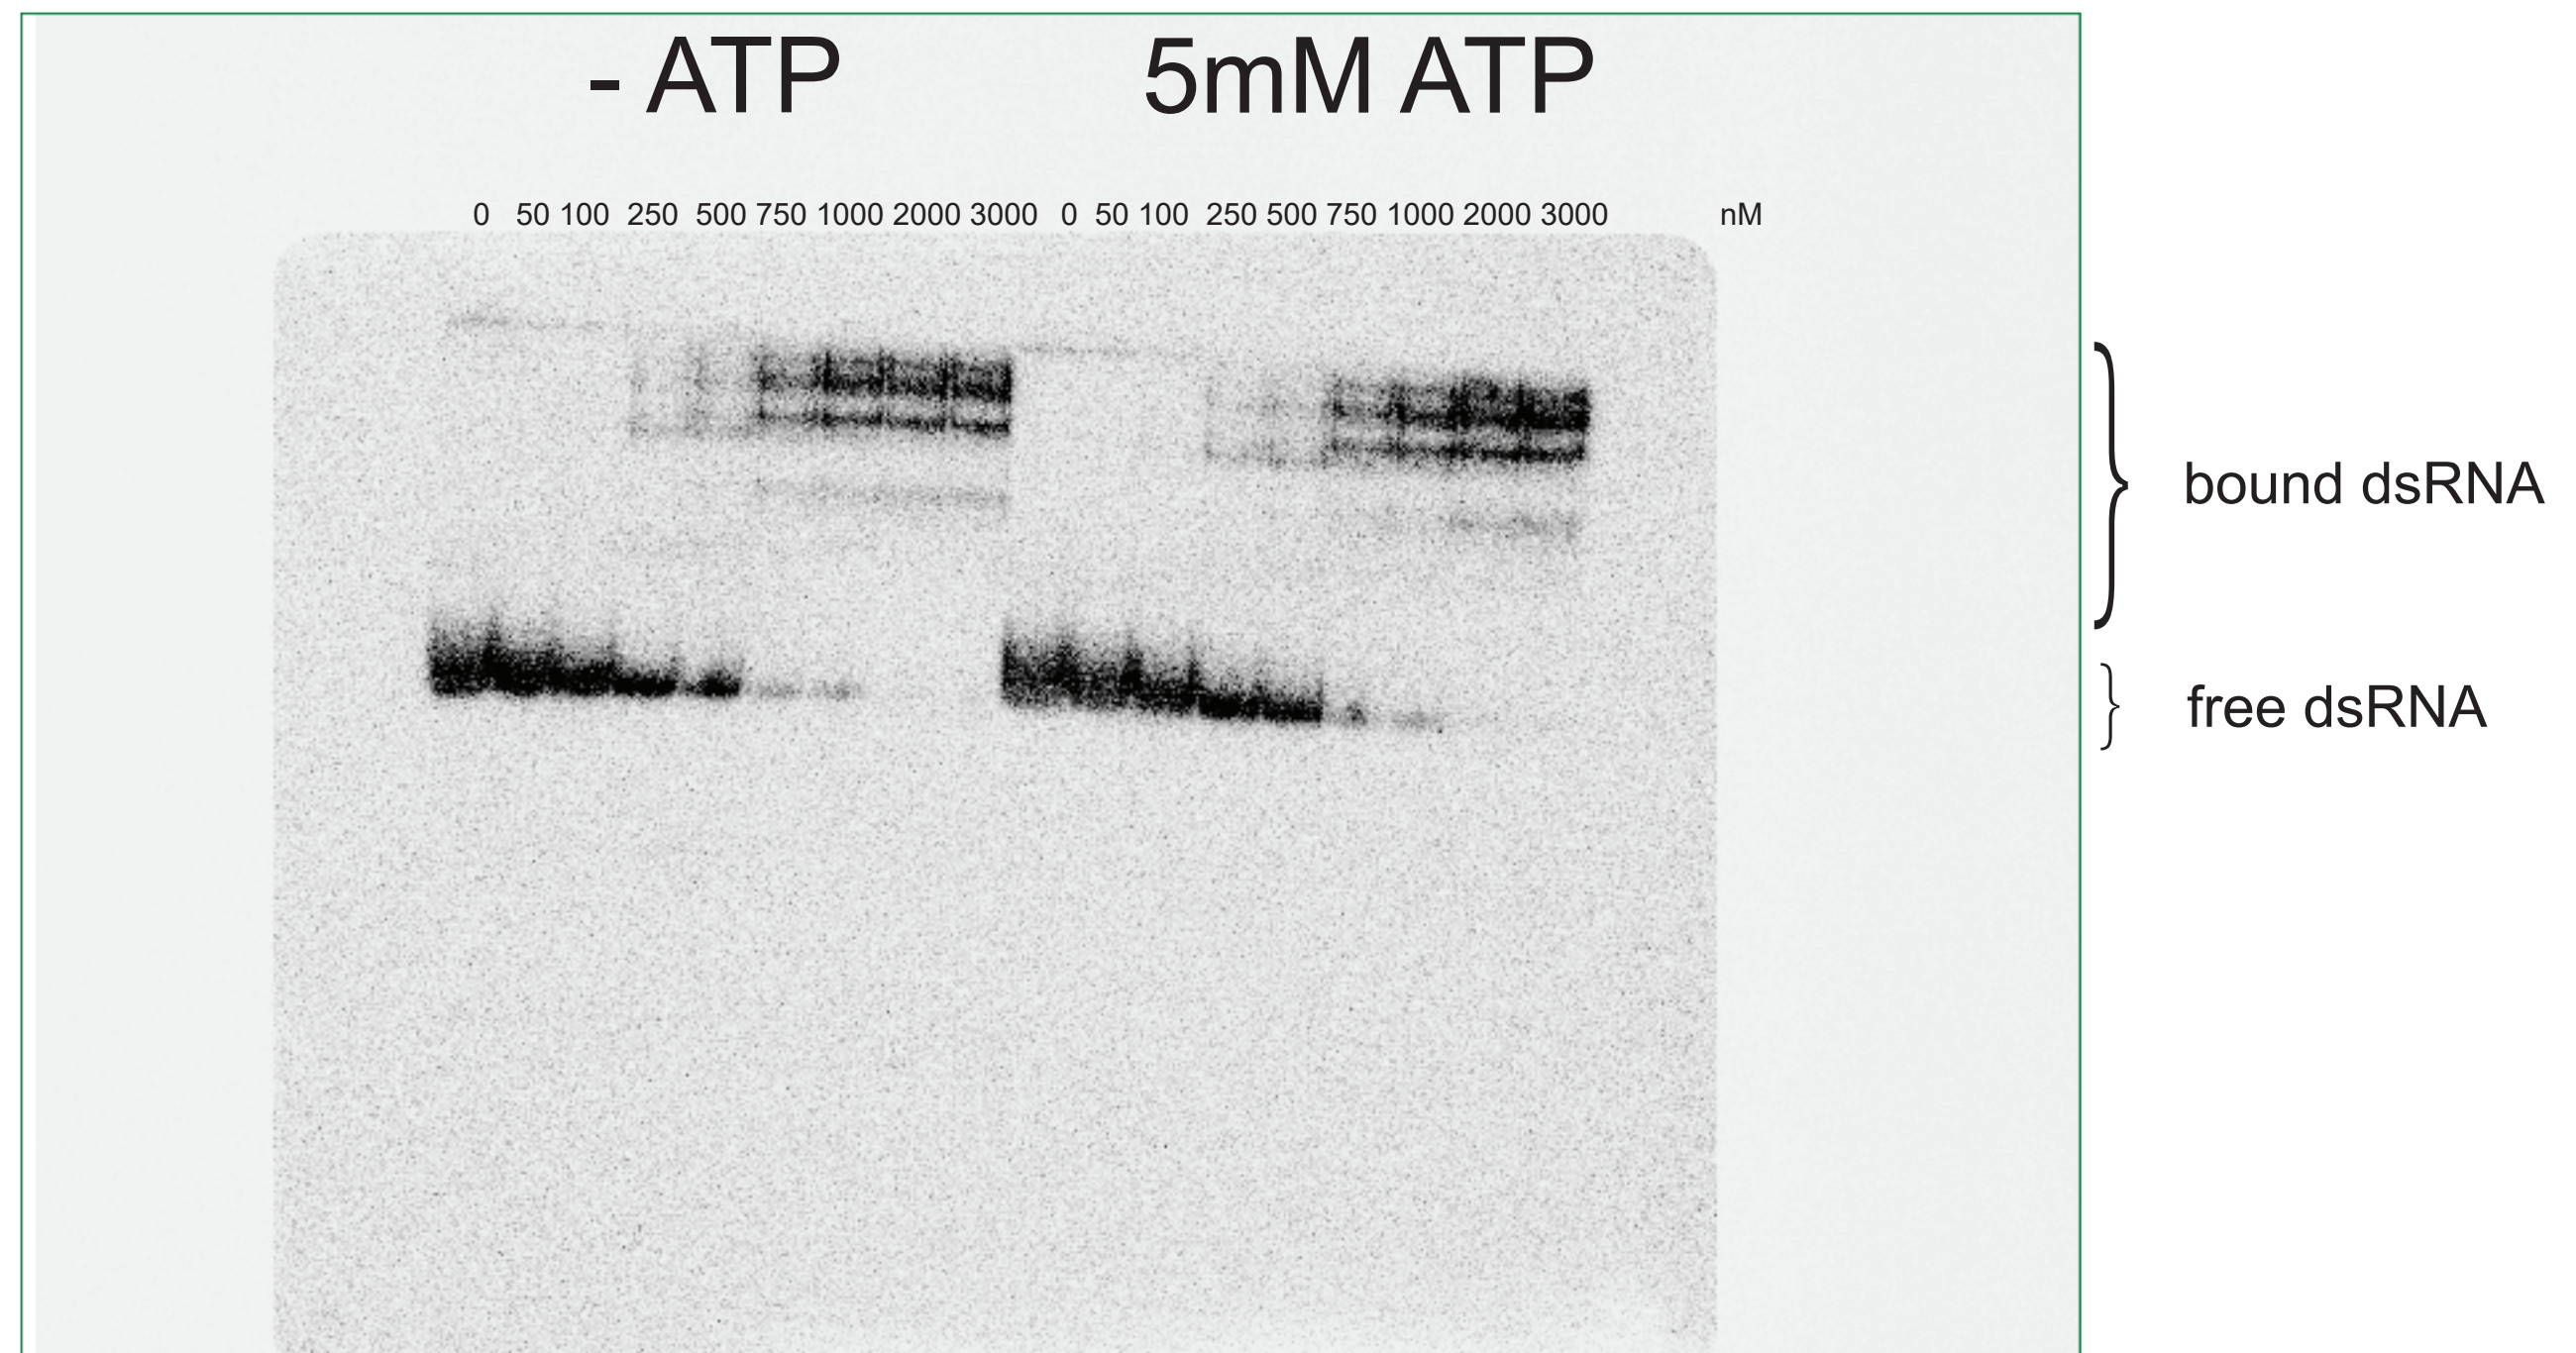

42 BLT dsRNA

Figure 3 - source data 6: Original digital image of phosphorimager scan used in Figure 3F.
