# Supplementary material for: Ancestral protein reconstruction reveals evolutionary events governing variation in Dicer helicase function
Source: eLife journal article supplement (doi:10.7554/elife.85120), 2023-04-17
Supplement: fig4-figsupp4-data2 [file elife-85120-fig4-figsupp4-data2-v2.zip]

AncD1<sub>ARTH/LOPH/DEUT</sub>

- ATP

5mM ATP

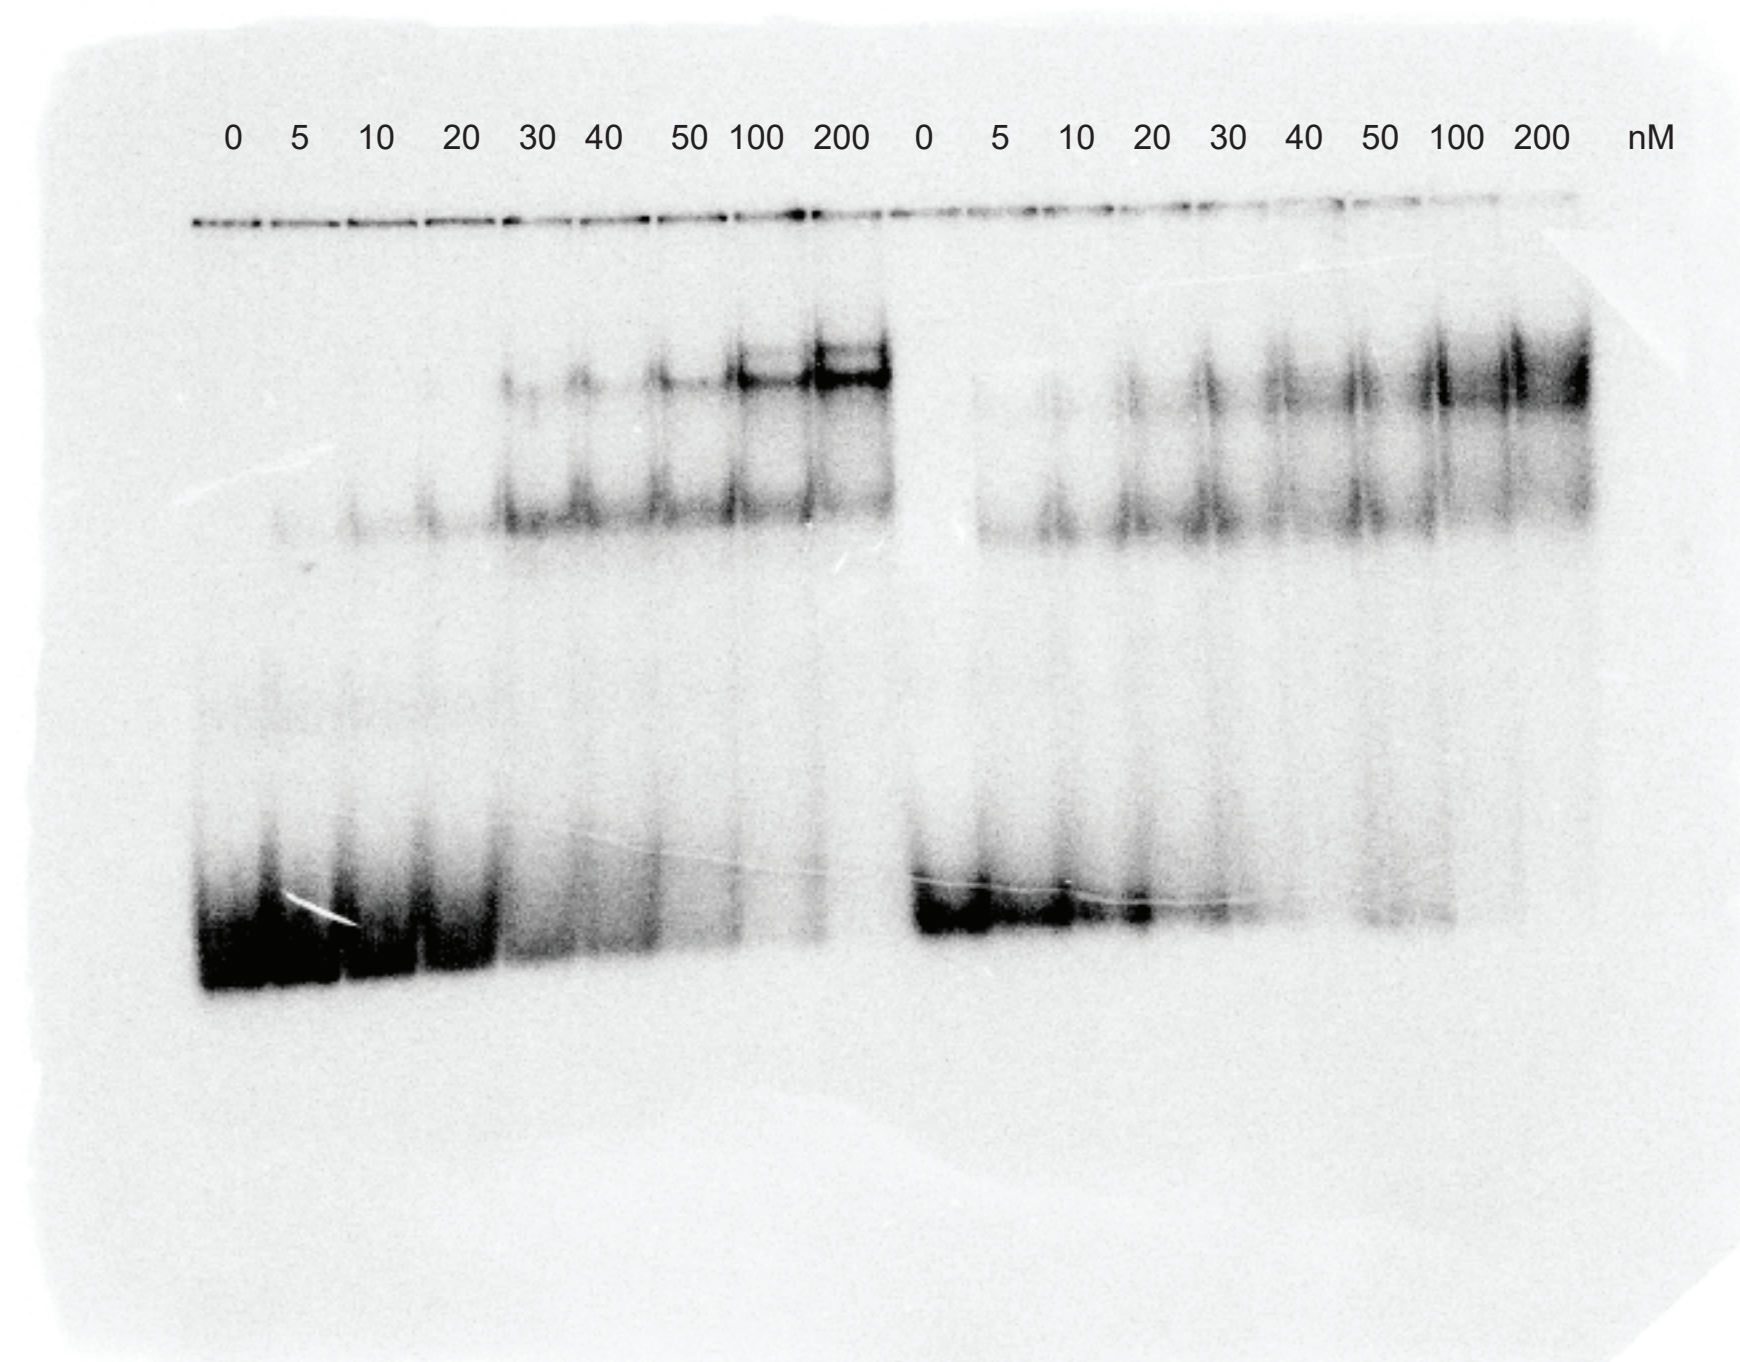

bound dsRNA

free dsRNA

42 3'ovr dsRNA

Figure 4 - figure supplement 4 - source data 2: Original digital image of phosphorimager scan used in B.
