# Supplementary material for: Ancestral protein reconstruction reveals evolutionary events governing variation in Dicer helicase function
Source: eLife journal article supplement (doi:10.7554/elife.85120), 2023-04-17
Supplement: fig4-figsupp4-data3 [file FIGURE 4-FIGURE SUPPLEMENT 4 - SOURCE DATA 3.pdf › FIGURE 4-FIGURE SUPPLEMENT 4 - SOURCE DATA 3.pdf]

AncD1<sub>LOPH/DEUT</sub>

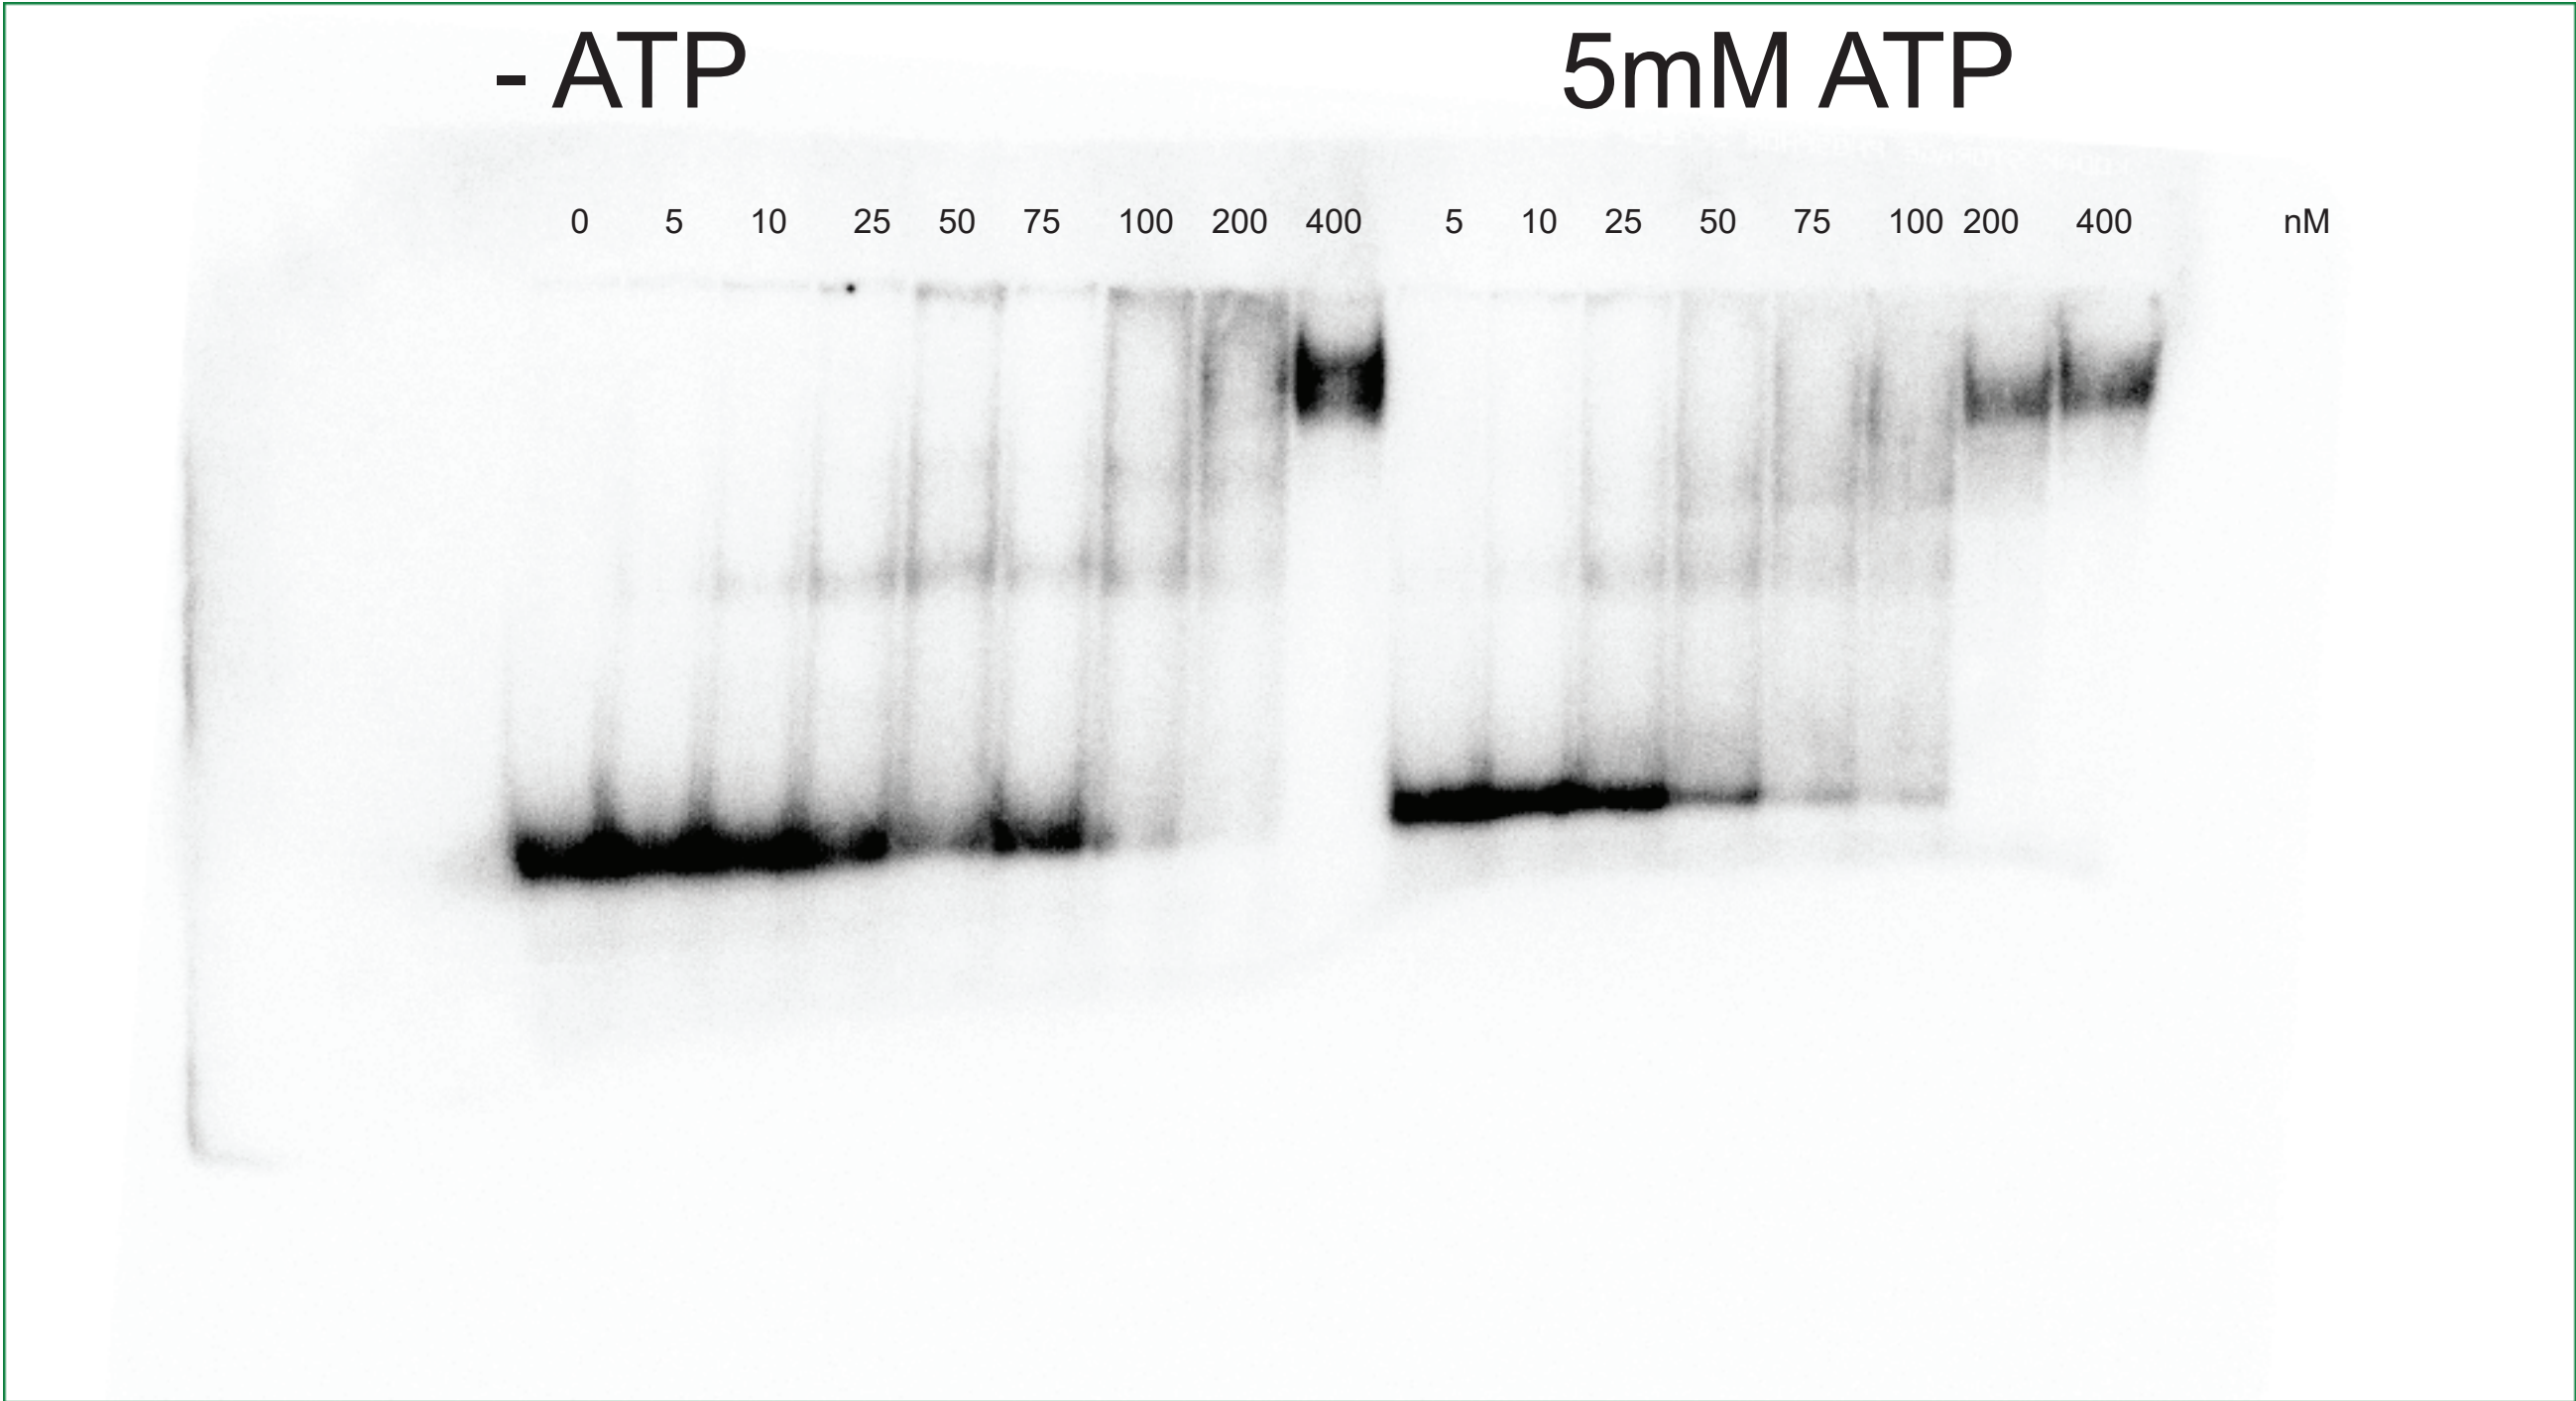

42 BLT dsRNA

Figure 4 - figure supplement 4 - source data 3: Original digital image of phosphorimager scan used in C.
