# Supplementary figures and images for: Ancestral protein reconstruction reveals evolutionary events governing variation in Dicer helicase function
Source: eLife journal article supplement (doi:10.7554/elife.85120), 2023-04-17

# AncD1D2

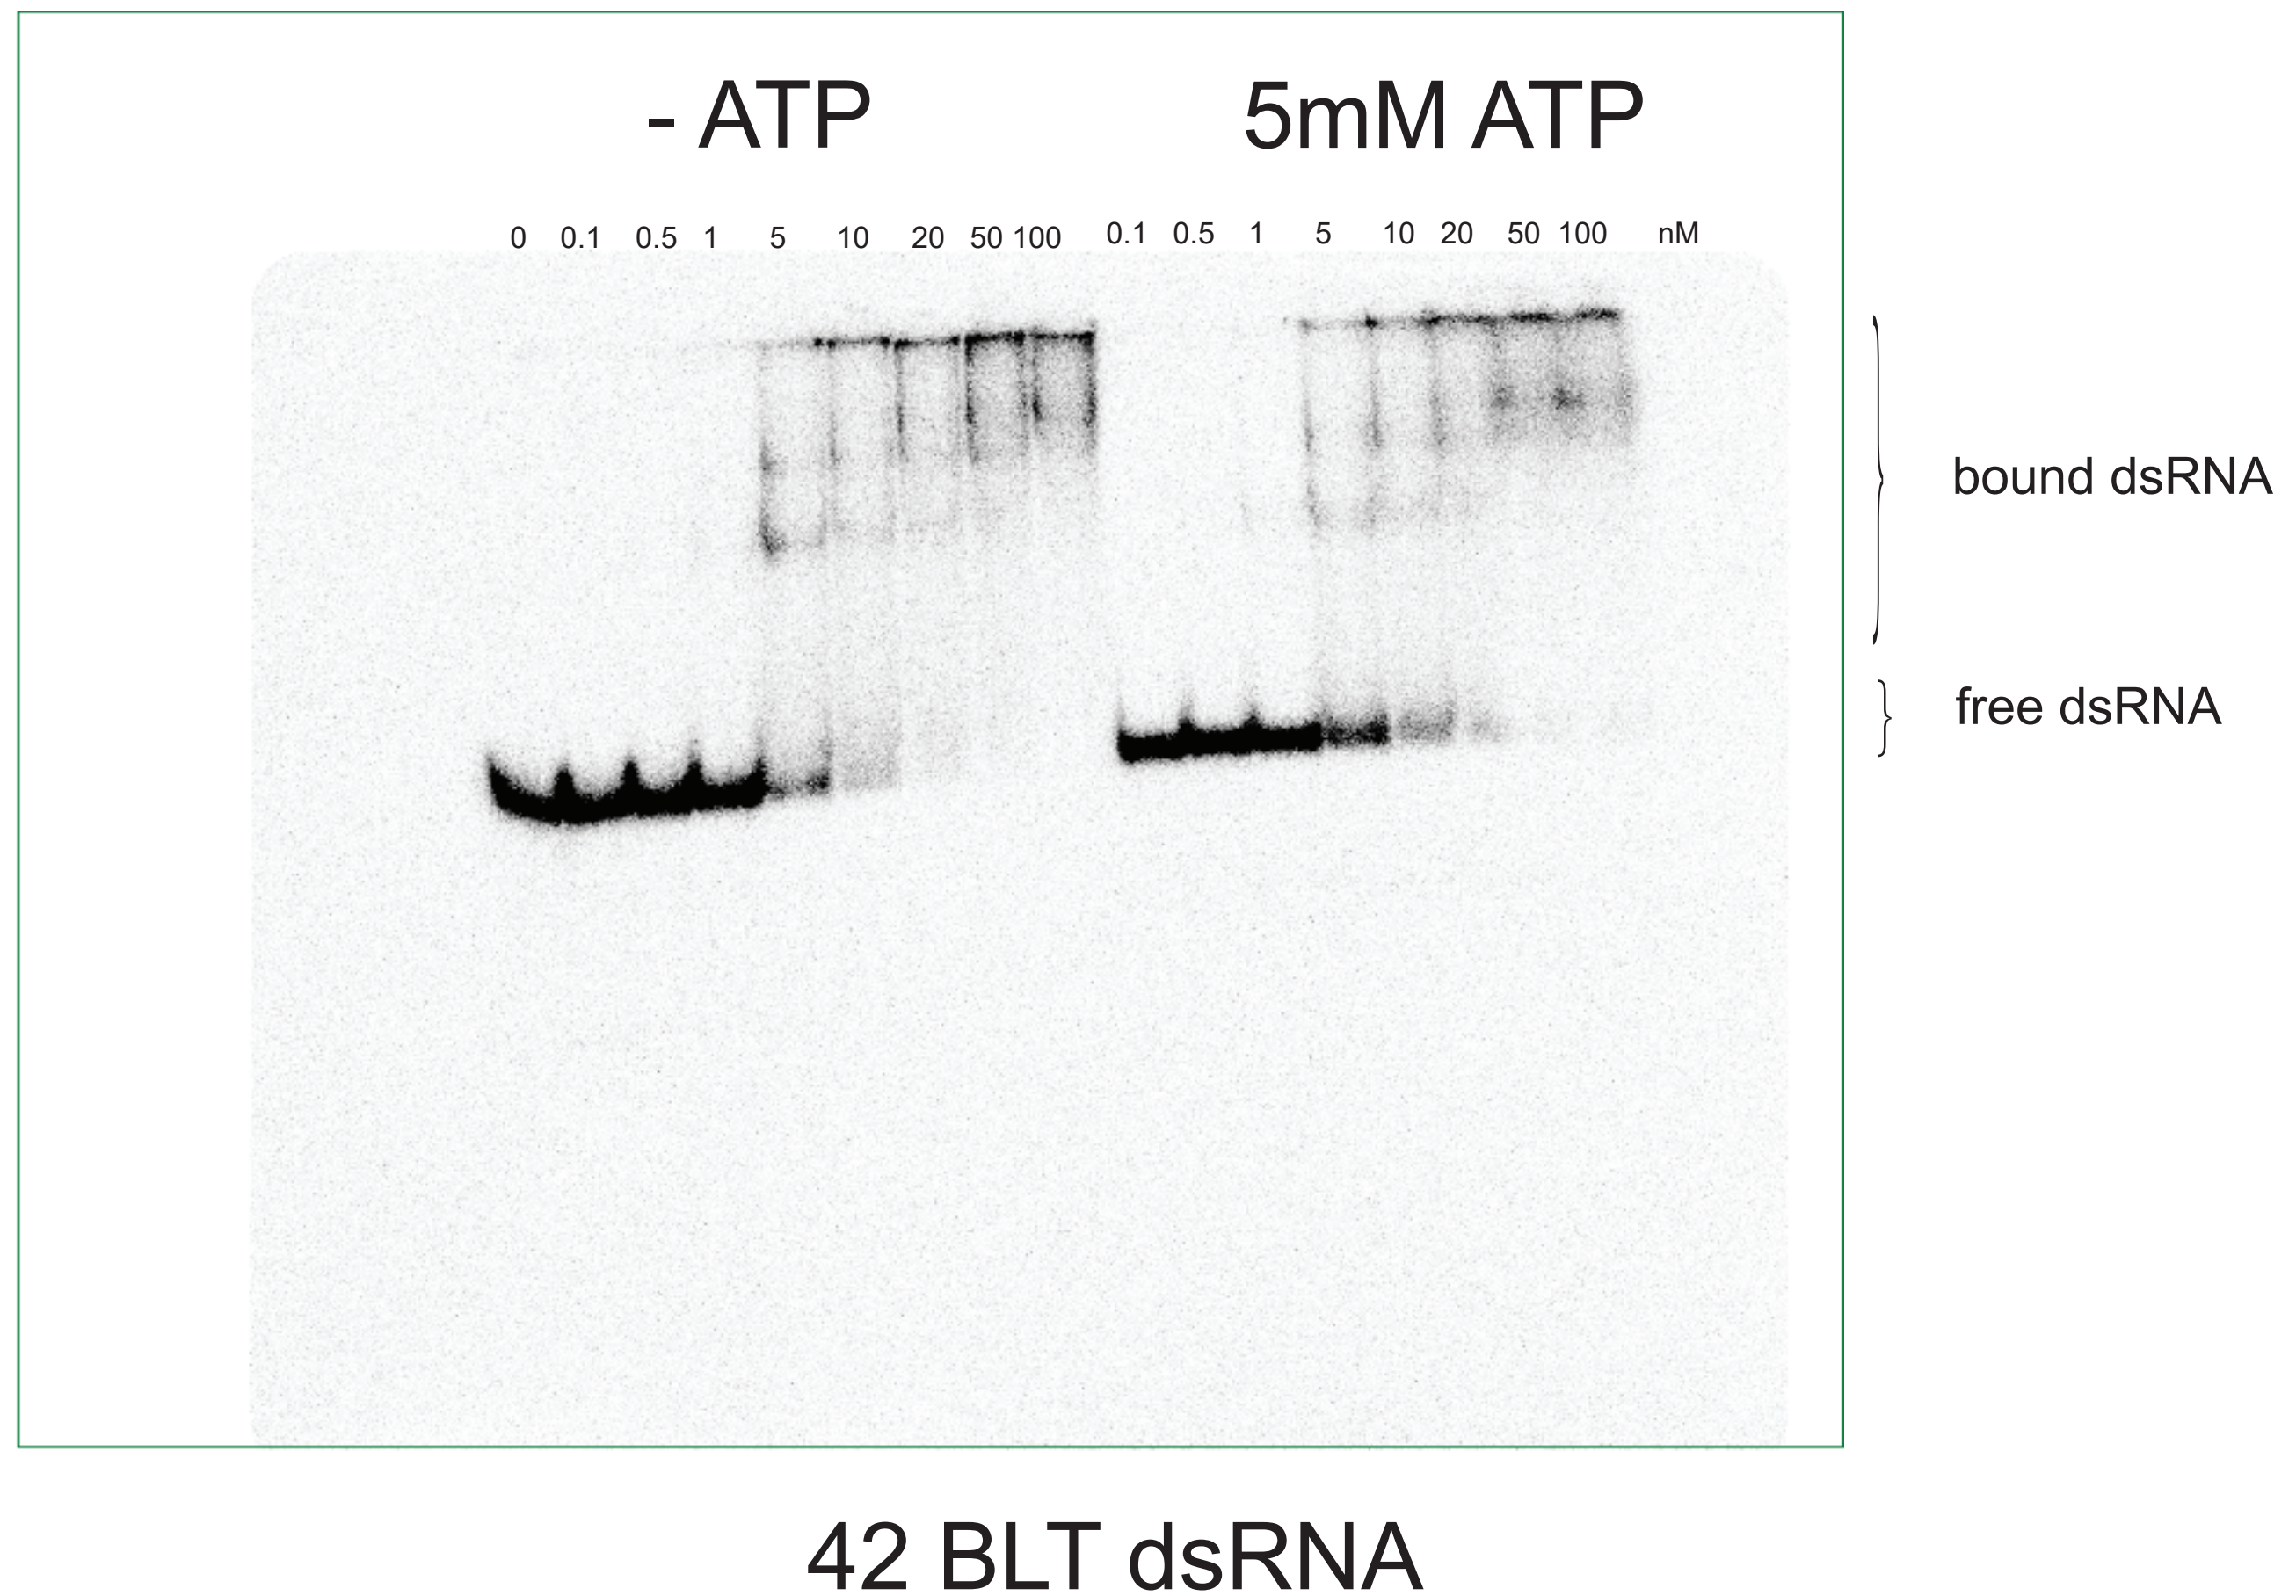

Figure 3 - source data 1: Original digital image of phosphoimager scan used in Figure 3B.

Supplement: fig3-data1 [file elife-85120-fig3-data1-v2.zip]

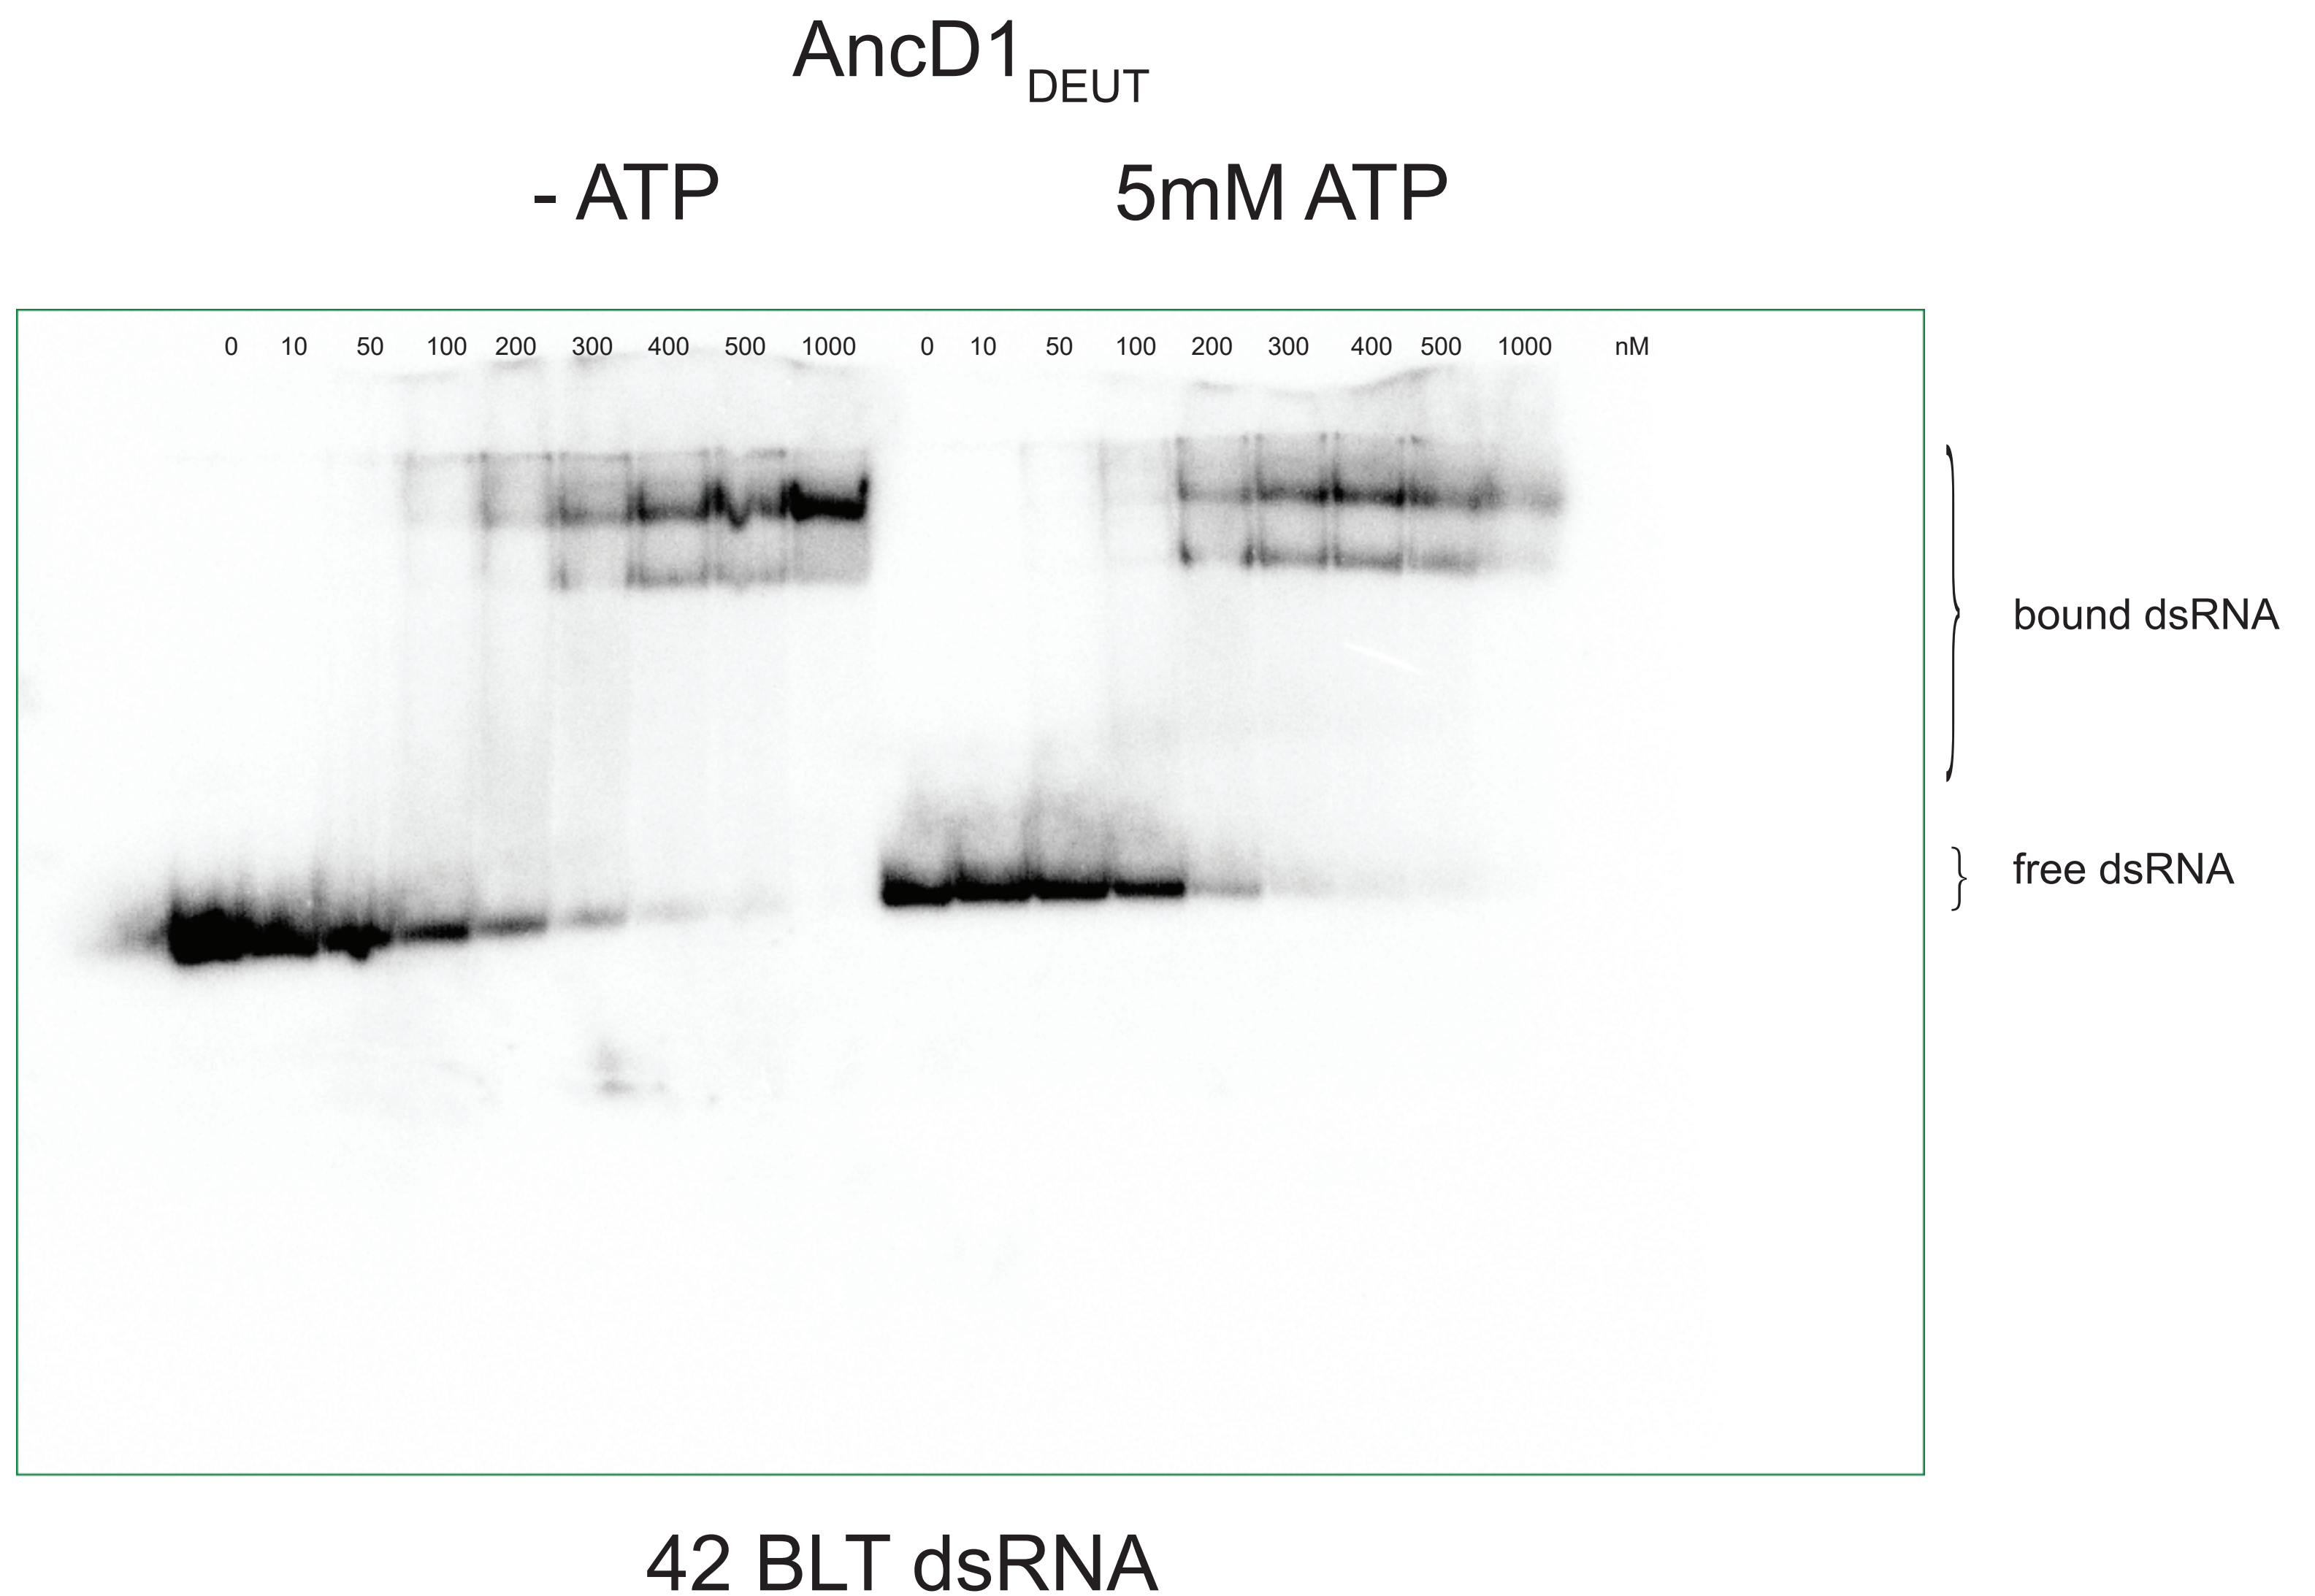

Figure 3 - source data 4: Original digital image of phosphorimager scan used in Figure 3D.

Supplement: fig3-data4 [file FIGURE 3 - SOURCE DATA 4 ANCD1DEUT BLT.pdf › FIGURE 3 - SOURCE DATA 4 ANCD1DEUT BLT.pdf]
